# Supplementary material
Source: PubMed Central journal article supplement (PMC3072622)
Supplement: mmc1.pdf [file mmc1.pdf]

## [Supplement Material]

Kim *et al.*

### Cell-matrix adhesion dynamics using surface plasmon resonance imaging ellipsometry

**Supplementary Table 1.** Parameters used for the simulation of normalized intensity as a function of cell-matrix distance in Figure 1C.

| Parameter | Value              | Description                                     |
|-----------|--------------------|-------------------------------------------------|
| $n_P$     | 1.7367             | Refractive index of SF10 prism                  |
| $n_G$     | $0.467 - i 2.4075$ | Refractive index of gold film                   |
| $d_G$     | 30 nm              | Thickness of gold film                          |
| $n_E$     | 1.45               | Refractive index of extracellular matrix        |
| $n_M$     | 1.333              | Refractive index of medium                      |
| $d_M$     | 0 ~ 150 nm         | Distance between cell membrane and gold surface |
| $n_C$     | 1.36               | Refractive index of cell                        |
| $P$       | $-14.65^\circ$     | Azimuth angle of polarizer                      |
| $C$       | $45^\circ$         | Azimuth angle of compensator                    |
| $A$       | $8.65^\circ$       | Azimuth angle of analyzer                       |
